# Supplementary material for: An Ultrasensitive Non-Enzymatic Sensor for Quantitation of Anti-Cancer Substance Chicoric Acid Based on Bimetallic Nanoalloy with Polyetherimide-Capped Reduced Graphene Oxide
Source: MDPI journal article supplement (doi:10.3390/nano10030499), 2020-03-10
Supplement: s1 [file s1]

## Supporting information

### **An ultrasensitive non-enzymatic sensor for quantitation of anti-cancer substance chicoric acid based on bimetallic nanoalloy with polyetherimide-capped reduced graphene oxide**

**Jun Jiao, Meixin Pan, Xinran Liu, Jian Liu, Binshuai Li, Qiang Chen \***

*The Key Laboratory of Bioactive Materials Ministry of Education, College of Life Science,  
Nankai University, Weijin Road No. 94, Tianjin 300071, PR China*

---

\*Corresponding author:

E-mail address: [qiangchen@nankai.edu.cn](mailto:qiangchen@nankai.edu.cn) (Q. Chen).

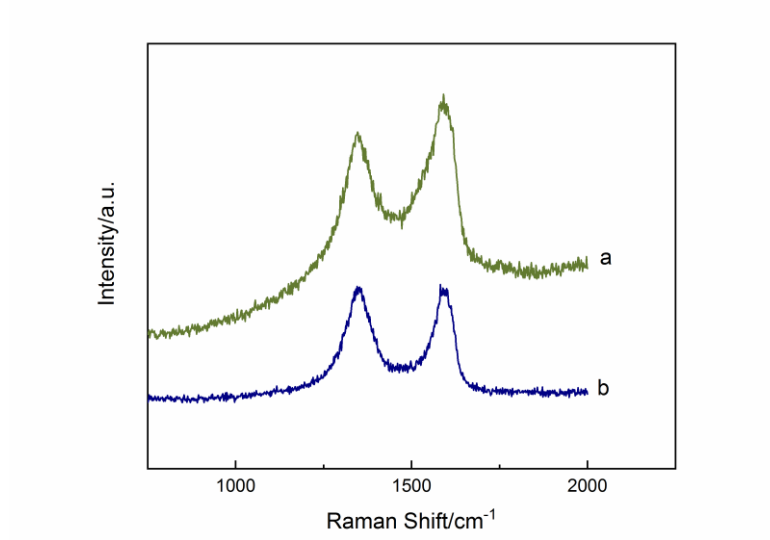

**Figure S1.** The Raman spectra of GO(a) and the PEI-RGO(b).

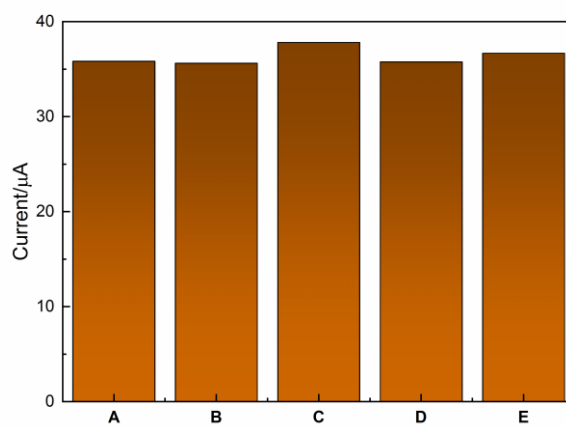

**Figure S2.** Column graph of PDV signals in  $\text{Na}_2\text{HPO}_4$ -citric acid buffer solution (pH 3) containing 0.01mM of chicoric acid at five different electrodes prepared under the same conditions.
